# Supplementary material for: Flexible torsion-angle noncrystallographic symmetry restraints for improved macromolecular structure refinement
Source: PubMed Central journal article supplement (PMC4014122; doi:10.1107/s1399004714003277), 2014-04-30
Supplement: d-70-01346-sup1.pdf [file d-70-01346-sup1.pdf]

# Acta Crystallographica Section D

Volume 70 (2014)

Supporting information for article:

**Flexible torsion angle non-crystallographic symmetry restraints  
for improved macromolecular structure refinement**

**Jeffrey J. Headd, Nathaniel Echols, Pavel V. Afonine, Nigel W. Moriarty,  
Richard J. Gildea and Paul D. Adams**

**Table S1** Moderate Resolution MR Test Set

| <b>PDB ID</b> | <b>Resolution</b> | <b># NCS<br/>copies</b> | <b>MR search model<br/>PDB ID</b> |
|---------------|-------------------|-------------------------|-----------------------------------|
| 1c03          | 2.30              | 4                       | 1c02                              |
| 1ck4          | 2.20              | 2                       | 1pt6                              |
| 1fvj          | 2.06              | 2                       | 1dsb                              |
| 1g83          | 2.60              | 2                       | 3uf4                              |
| 1j2f          | 2.30              | 2                       | 3a77                              |
| 1jbb          | 2.00              | 2                       | 2gmi                              |
| 1ng5          | 2.00              | 2                       | 1qwz                              |
| 1o65          | 2.33              | 3                       | 1o67                              |
| 1pcv          | 2.30              | 2                       | 2i0w                              |
| 1pk5          | 2.40              | 2                       | 1zh7                              |
| 1s5v          | 2.35              | 2                       | 3i7q                              |
| 1xiz          | 2.00              | 2                       | 3lf6                              |
| 1yz1          | 2.00              | 4                       | 3ebm                              |
| 2azo          | 2.30              | 2                       | 1azo                              |
| 2c24          | 2.27              | 2                       | 1wmx                              |
| 2c4p          | 2.35              | 2                       | 2yho                              |
| 2ckg          | 2.45              | 2                       | 2xph                              |
| 2d2z          | 2.20              | 3                       | 2ahe                              |
| 2dps          | 2.40              | 2                       | 2cxa                              |
| 2f6b          | 2.80              | 2                       | 1qh6                              |
| 2fxk          | 2.54              | 2                       | 1yd9                              |
| 2o9f          | 2.55              | 2                       | 1rc2                              |
| 2qw4          | 2.80              | 4                       | 1yje                              |
| 2qxt          | 2.00              | 2                       | 1t4m                              |
| 2vj5          | 3.00              | 2                       | 2vix                              |
| 2vpi          | 2.40              | 2                       | 2vx0                              |
| 2vs6          | 2.40              | 2                       | 2jdl                              |
| 2wqx          | 2.03              | 2                       | 2uzx                              |
| 2x16          | 2.13              | 2                       | 2vei                              |
| 2xee          | 2.10              | 4                       | 2xeh                              |
| 2z16          | 2.02              | 2                       | 3md2                              |
| 2z1i          | 2.00              | 2                       | 2z1g                              |
| 2z8m          | 2.00              | 2                       | 2q8y                              |
| 2ztz          | 2.00              | 2                       | 3zye                              |
| 3amh          | 2.09              | 2                       | 3amn                              |
| 3asg          | 2.33              | 2                       | 3as4                              |

|      |      |   |      |
|------|------|---|------|
| 3cw0 | 2.40 | 4 | 3efp |
| 3esv | 2.00 | 2 | 3et9 |
| 3gaq | 2.25 | 2 | 1qft |
| 3gqm | 2.10 | 2 | 3eir |
| 3hwi | 2.29 | 2 | 3aay |
| 3im5 | 2.55 | 2 | 3im6 |
| 3jwi | 2.20 | 2 | 3jwg |
| 3k9k | 2.55 | 2 | 3k9j |
| 3ks4 | 2.40 | 2 | 3l2a |
| 3l2z | 2.80 | 2 | 2cgh |
| 3l56 | 2.30 | 2 | 3cw4 |
| 3ncx | 2.60 | 2 | 2zqk |
| 3nfh | 2.17 | 2 | 3nfi |
| 3o9r | 2.00 | 2 | 3l4q |
| 3omw | 2.87 | 4 | 3p9y |
| 3p2i | 2.40 | 2 | 3pb3 |
| 3pxj | 2.30 | 4 | 2yd1 |
| 3qyd | 2.97 | 3 | 3i2x |
| 3t7j | 2.04 | 2 | 3t7i |
| 3tgz | 2.30 | 2 | 3p90 |

**Table S2** 1.0Å-4.1Å Re-refinement Test Set

| PDB ID | Resolution | # NCS Copies |
|--------|------------|--------------|
| 1mn8   | 1.00       | 4            |
| 3m9j   | 1.10       | 2            |
| 3d95   | 1.20       | 2            |
| 1kmt   | 1.30       | 2            |
| 2ohw   | 1.40       | 2            |
| 3w3e   | 1.50       | 2            |
| 4j7w   | 1.60       | 2            |
| 4dov   | 1.70       | 2            |
| 4guz   | 1.80       | 4            |
| 3v3s   | 1.90       | 2            |
| 4ilj   | 2.00       | 2            |
| 4gkf   | 2.10       | 2            |
| 4lq8   | 2.20       | 2            |
| 4h43   | 2.30       | 2            |
| 4hu4   | 2.40       | 2            |
| 4lla   | 2.50       | 3            |
| 4hl0   | 2.00       | 2            |
| 4kw3   | 2.70       | 2            |
| 4ey0   | 2.80       | 4            |
| 4i6p   | 2.90       | 2            |
| 4hfy   | 3.00       | 2            |
| 2etc   | 3.10       | 2            |
| 2vr9   | 3.20       | 3            |
| 2etn   | 3.30       | 3            |
| 3p0l   | 3.40       | 4            |
| 2xi1   | 3.50       | 2            |
| 3s0x   | 3.60       | 2            |
| 2y22   | 3.70       | 6            |
| 2bbz   | 3.80       | 4            |
| 1z9x   | 3.93       | 3            |
| 3bbw   | 4.00       | 2            |
| 1xdv   | 4.10       | 2            |

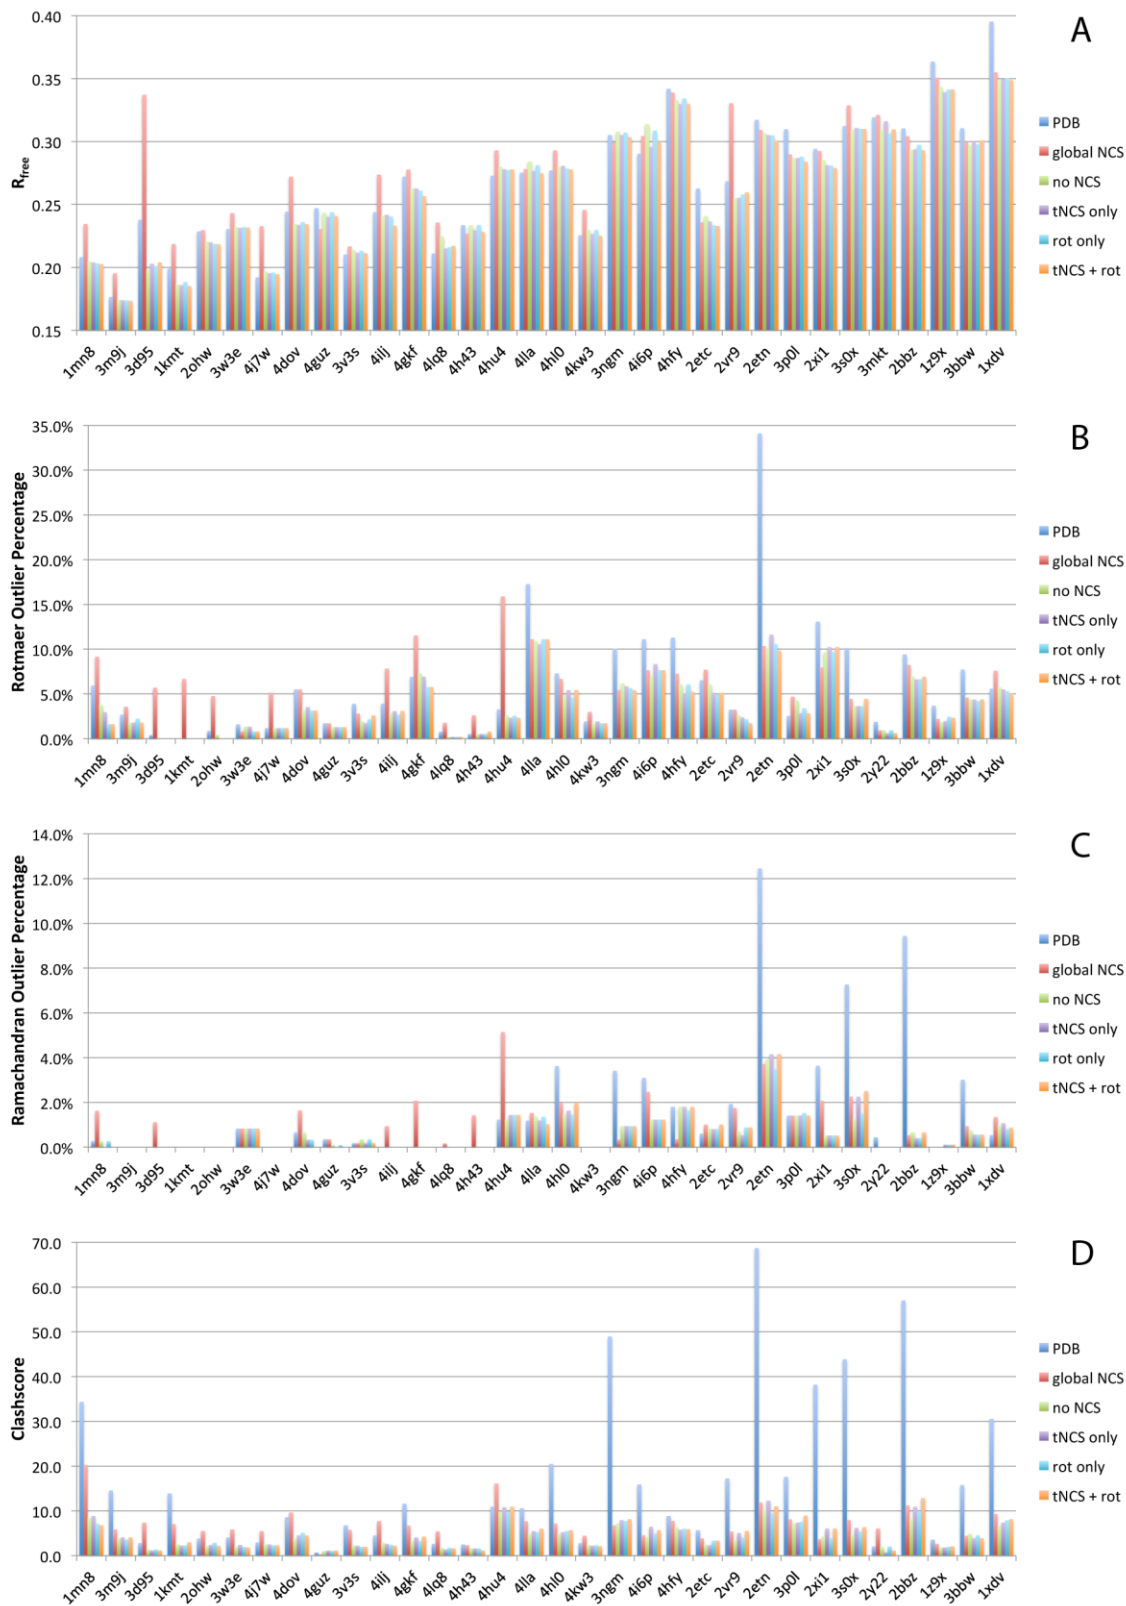

**Figure S1** Summary of results of re-refinement tests for deposited PDB structures ranging from 1.0-4.1 Å resolution. For each metric, the value for the deposited PDB model is given in blue, followed by refinement using global NCS (red), no NCS (green), torsion NCS only (purple), NCS-related rotamer correction (light blue), and torsion NCS plus NCS-related rotamer correction (orange). Results are presented from left to right, highest (1.0 Å) to lowest (4.1 Å) resolution. A)  $R_{\text{free}}$  values. B) Rotamer outlier percentage. C) Ramachandran outlier percentage. D) Clashscore.
